# Supplementary material
Source: publisher site journal article supplement (https://www.dovepress.com/article/506412)
Supplement: Supplementary file 1 [file get_supplementary_file.php]

**Supplementary files**

**Increment of Skeletal Muscle Mass Predicts Survival Benefit for Hepatocellular Carcinoma Treated with Transarterial Chemoembolization Combining Molecular Targeted Agents and Immune Checkpoint Inhibitors**

**Supplementary Table 1.** Predictive Factor Analysis for Overall Survival in muscle maintian group and muscle down group.

| **Variables** | **Univariate** | | **Multivariate** | |
| --- | --- | --- | --- | --- |
| **HR (95% CI)** | ***P*** | **HR (95% CI)** | ***P*** |
| Age | 1.00 (0.97–1.03) | 0.910 |  |  |
| BCLC (C) | 1.86 (0.96–3.59) | 0.066 | 1.52 (0.78–2.97) | 0.218 |
| Child-Pugh Class (B) | 1.61 (0.73–3.58) | 0.240 |  |  |
| ECOG score (1) | 1.24 (0.65–2.38) | 0.517 |  |  |
| AFP (≥ 400 ng/ml) | 1.74 (0.89–3.41) | 0.105 |  |  |
| Albumin | 0.98 (0.92–1.04) | 0.516 |  |  |
| SMI | 0.99 (0.95–1.03) | 0.466 |  |  |
| SFA | 0.99 (0.96–1.00) | 0.098 | 0.99 (0.99–1.00) | 0.019 |
| Muscle maintain | 0.42 (0.21–0.82) | 0.011 | 0.31 (0.14–0.66) | 0.002 |

**Abbreviations**: BCLC, Barcelona Clinic Liver Cancer; ECOG, Eastern Cooperative Oncology Group; AFP, α‐fetoprotein. SMI, skeletal muscle index; SFA, subcutaneous fat area.

**Supplementary Table 2.** Tumor Response on Modified Response Evaluation Criteria in Solid Tumors

|  | **Muscle gain**  **(n=23)** | **Non muscle gain**  **(n=69)** | ***P* valve** | **Muscle maintain**  **(n=41)** | **Muscle down**  **(n=28)** | ***P* valve** |
| --- | --- | --- | --- | --- | --- | --- |
| CR | 2 (8.7%) | 2 (2.9%) | 0.259 | 1 (2.4%) | 1 (3.6%) | 1.000 |
| PR | 14 (60.9%) | 38 (55.1%) | 0.809 | 21 (51.2%) | 17 (60.7%) | 0.470 |
| SD | 2 (8.7%) | 8 (11.6%) | 1.000 | 5 (12.2%) | 3 (10.7%) | 1.000 |
| PD | 5 (21.7%) | 21 (30.4%) | 0.594 | 14 (34.1%) | 7 (25.0%) | 0.441 |
| ORR | 16 (69.6%) | 40 (58.0%) | 0.460 | 22 (53.7%) | 18 (64.3%) | 0.460 |
| DCR | 18 (78.3%) | 48 (69.6%) | 0.594 | 27 (65.9%) | 21 (75.0%) | 0.441 |

**Abbreviations:** CR, complete response; PR, partial response; SD, stable response; ORR, objective response rate; PD, progressive disease; DCR, disease control rate.


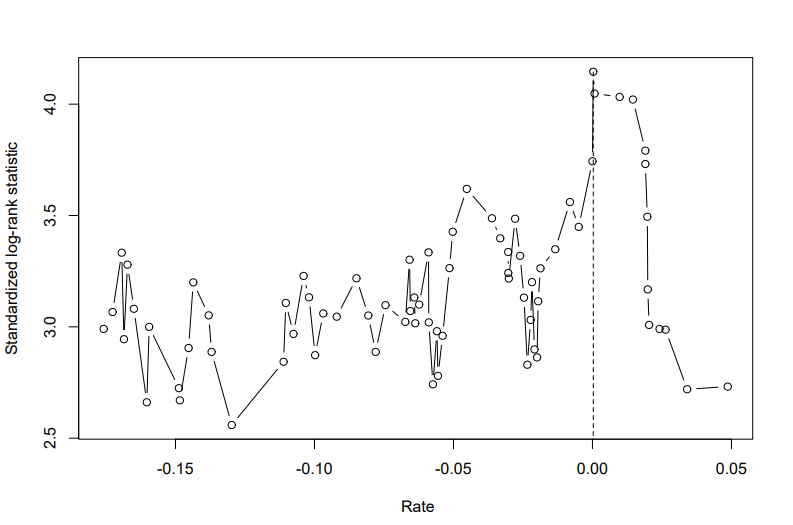


**Supplementary Figure 1.** Cutoff point of SMI defined via maximally selected log rank statistics. The cutoff value for ΔSMI was 0.03%.


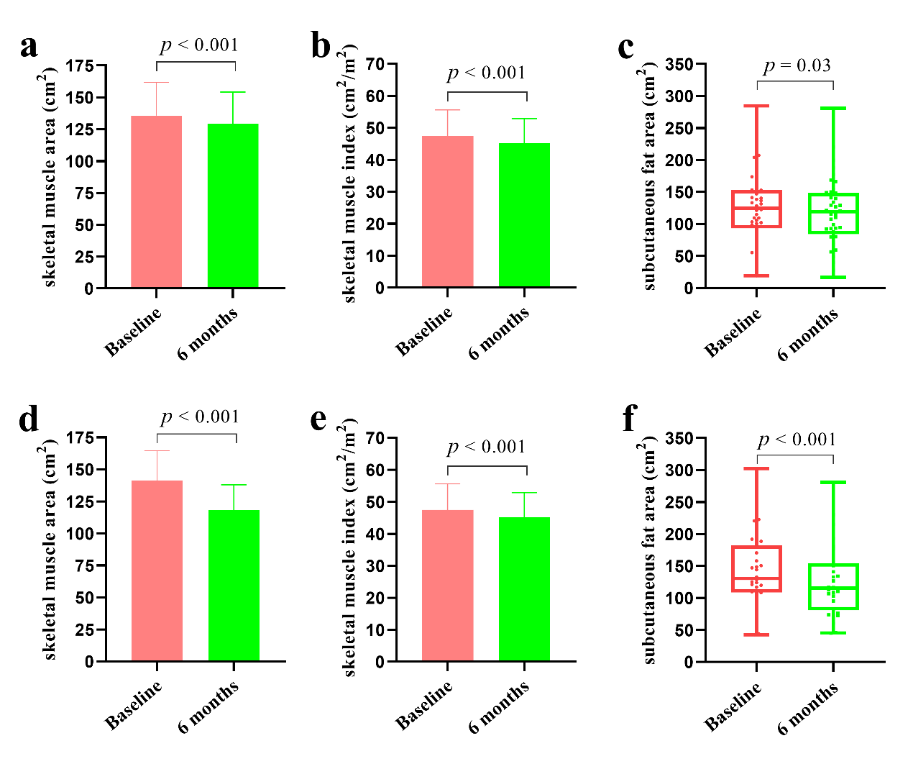


**Supplementary Figure 2.** Graphs after triple therapy in patients with muscle maintain group show time-course changes of (a) skeletal muscle area (SMA), (b) skeletal muscle index (SMI), (c) subcutaneous fat area (SFA). Graphs after triple therapy in patients with muscle down group show time-course changes of (d) mean skeletal muscle area (SMA), (e) skeletal muscle index (SMI), (f) subcutaneous fat area (SFA).
